# Supplementary figures and images for: A novel N-terminal extension in mitochondrial TRAP1 serves as a thermal regulator of chaperone activity
Source: eLife journal article supplement (doi:10.7554/elife.03487), 2014-12-22

# Arrhenius fit (Hsp90 homologs)

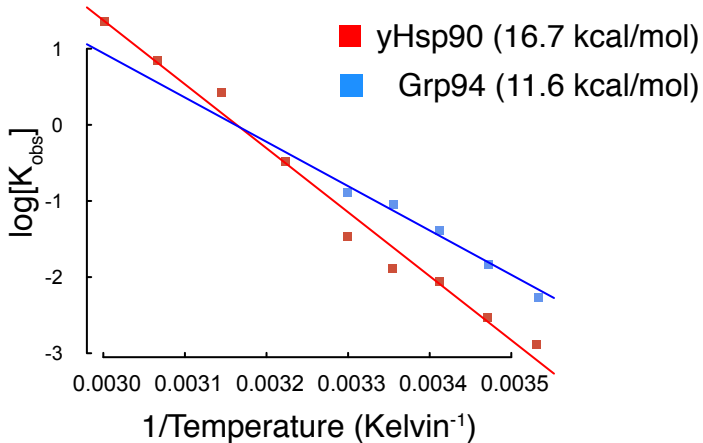

Supplement: supp [file elife-03487-supp-v1.zip]

**A**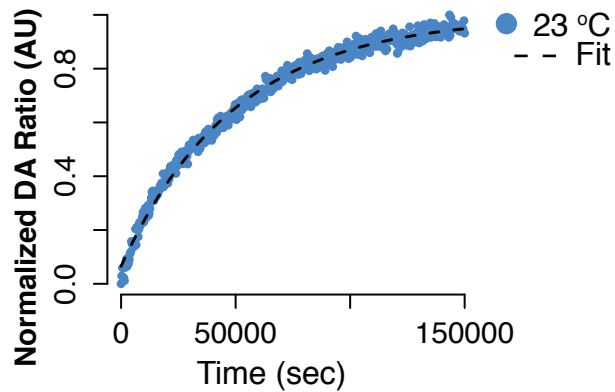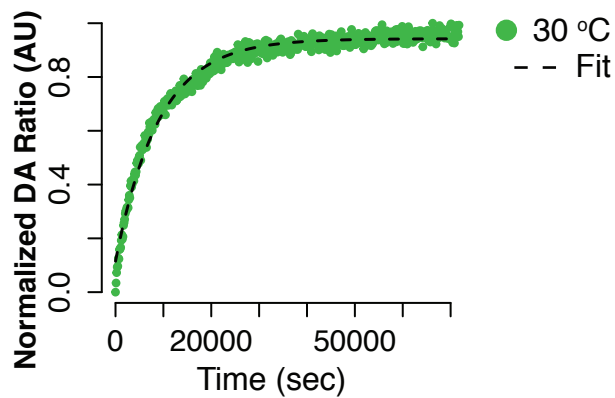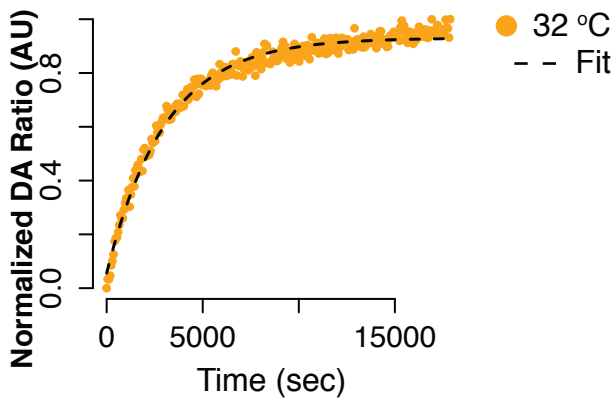**B**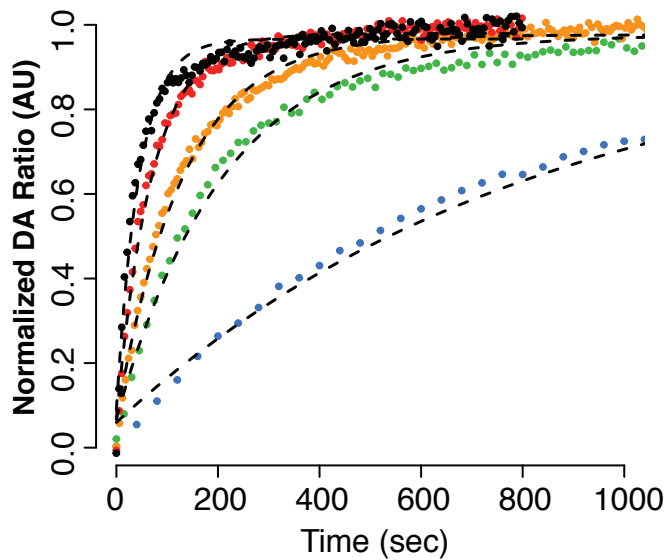

Supplement: supp [file elife-03487-supp-v1.zip]

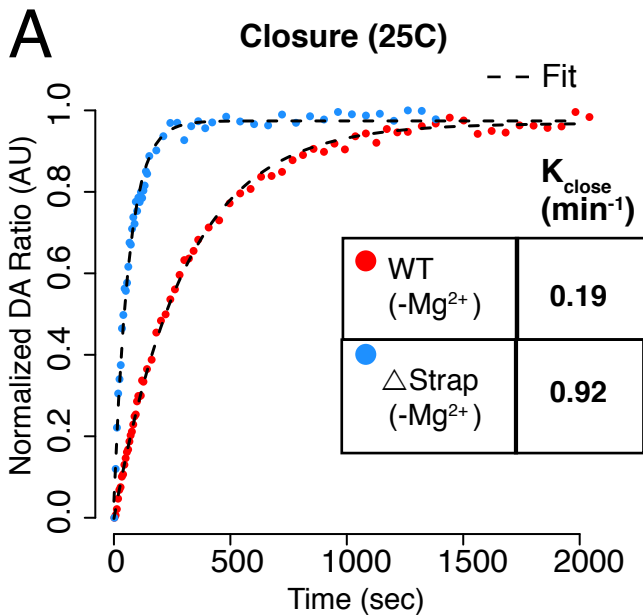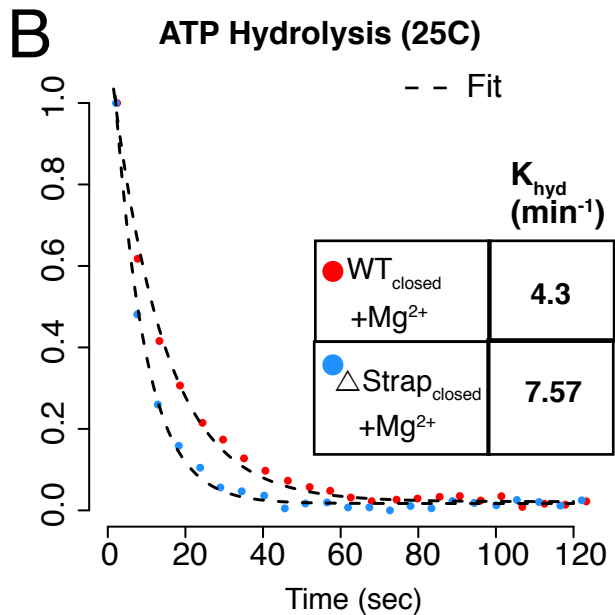

Supplement: supp [file elife-03487-supp-v1.zip]
